# Supplementary material
Source: Springer Nature journal article supplement (https://www.springermedizin.de/resource/supplementary/12885_2013_3973_MOESM3_ESM.pdf/9464924)

**a**

■ control cells ■ ssiRNA negative control ■ ssiRNA Survivin

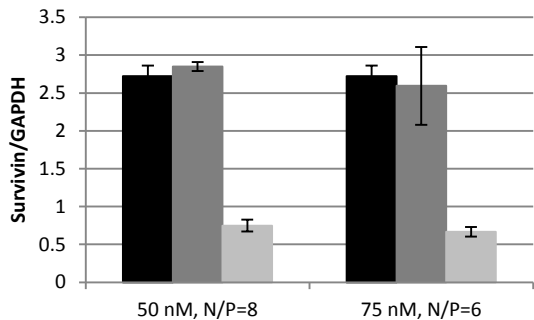**c**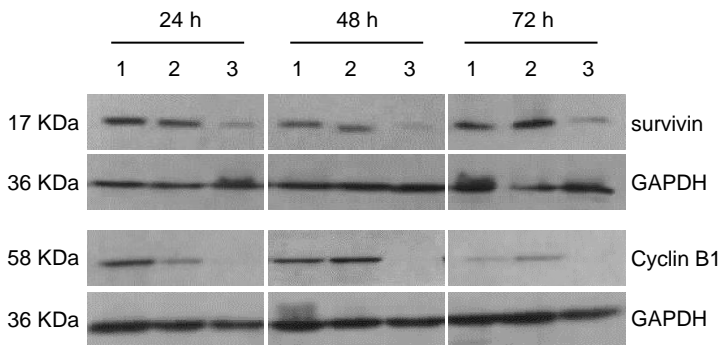**b**

■ control cells ■ ssiRNA negative control ■ ssiRNA cyclin B1

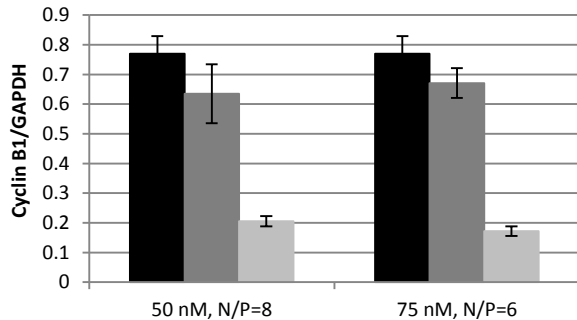**d**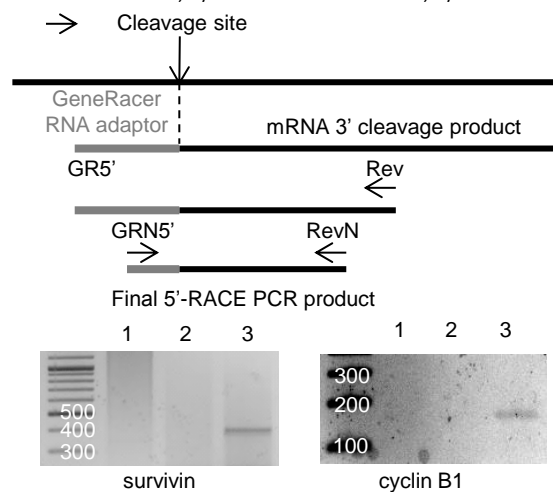

Supplement: MOESM3 [file 9464924]
